# Supplementary material for: Cladocera Responses to the Climate-Forced Abrupt Environmental Changes Related to the Late Glacial/Holocene Transition
Source: MDPI journal article supplement (doi:10.3390/w15020348), 2023-01-14
Supplement: s1 [file s1]

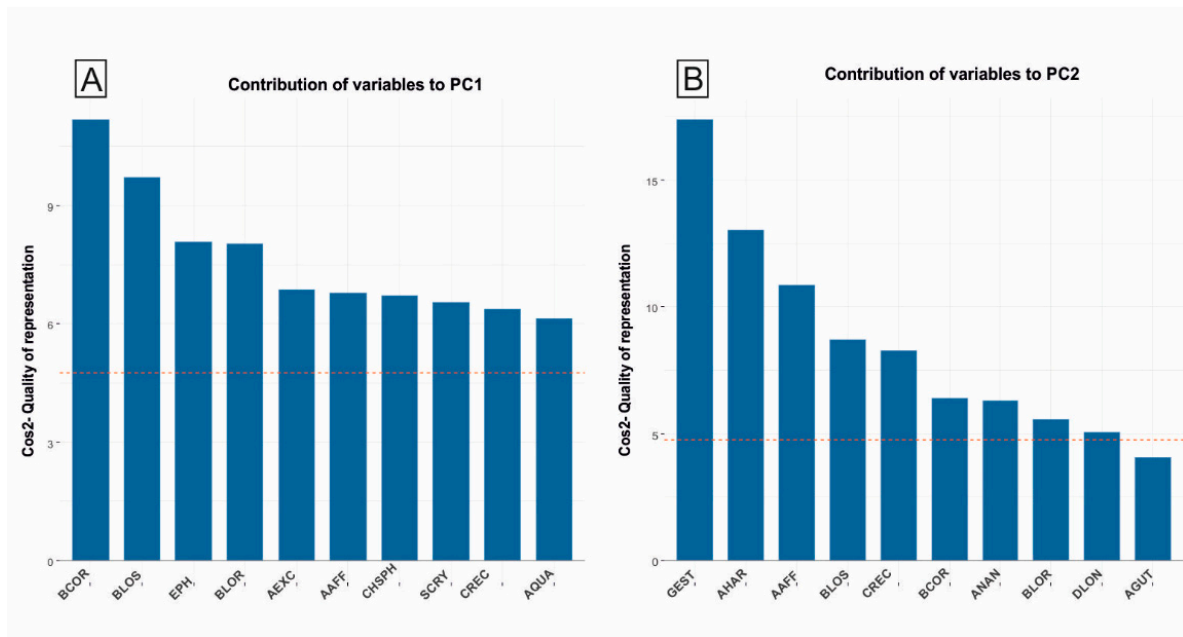

**Figure 1.** Diagrams of the quality representation for species on the PC1 (A) and PC2 (B). A high value of cos2 indicates a good representation..

**Table 1.** Results of radiocarbon dating together with calibrated and modeled ages.

| No. | Lab. code   | Depth cm | <sup>14</sup> C age BP | <sup>14</sup> C unc. | Calibration results<br>68.3% =<br>conf. int<br>cal BP | Modelled<br>68.3% =<br>conf. int<br>(μ ± σ)<br>cal BP |
|-----|-------------|----------|------------------------|----------------------|-------------------------------------------------------|-------------------------------------------------------|
| 1   | GdA-6218    | 744      | 9,410                  | 50                   | 10,700–<br>10,575                                     | 11,630–<br>11,506<br>(10,563±58)                      |
| 2   | GdA-6220    | 750      | 9,310                  | 50                   | 11,580–<br>10,419                                     | 10,688–<br>10,550<br>10,621±54                        |
| 3   | GdA-6223    | 769      | 9,700                  | 50                   | 11,205–<br>10,895                                     | 11,205–<br>11,117<br>11,148±65                        |
| 4   | GdA-5853    | 780–781  | 10,095                 | 80                   | 11,821–<br>11,404                                     | 11,523–<br>11,326<br>11,438±96                        |
| 5   | GdA-5853    | 811–812  | 9,920                  | 70                   | 11,600–<br>11,236                                     | 11,607–<br>11,455<br>11,531±73                        |
| 6   | Beta-570624 | 844      | 10,530                 | 30                   | 12,618–<br>12,488                                     |                                                       |
| 7   | GdA-5854    | 861–862  | 10,115                 | 50                   | 11,825–<br>11,507                                     | 11,875–<br>11,655<br>11,766±90                        |
| 8   | GdA-5732    | 872–873  | 10,320                 | 90                   | 12,453–<br>11,942                                     | 12,099–<br>11,890<br>12,010±98                        |

|    |          |         |        |    |                   |                                 |
|----|----------|---------|--------|----|-------------------|---------------------------------|
| 9  | GdA-5734 | 880–881 | 10,365 | 60 | 12,461–<br>12,049 | 12,251–<br>12,041<br>12,156±102 |
| 10 | GdA-5736 | 910–911 | 10,645 | 65 | 12,722–<br>12,623 | 12,691–<br>12,626<br>12,662±32  |
| 11 | GdA-5738 | 934–935 | 11,300 | 80 | 13,291–<br>13,116 | 13,307–<br>13,163<br>13,237±75  |
| 12 | GdA-5740 | 943–944 | 12,050 | 65 | 14,030–<br>13,809 | 13,941–<br>13,796<br>13,886±82  |
